# Supplementary material
Source: publisher site journal article supplement (https://www.dovepress.com/article/538953)
Supplement: Supplementary file 1 [file 538953%20Supplementary%20files.docx]

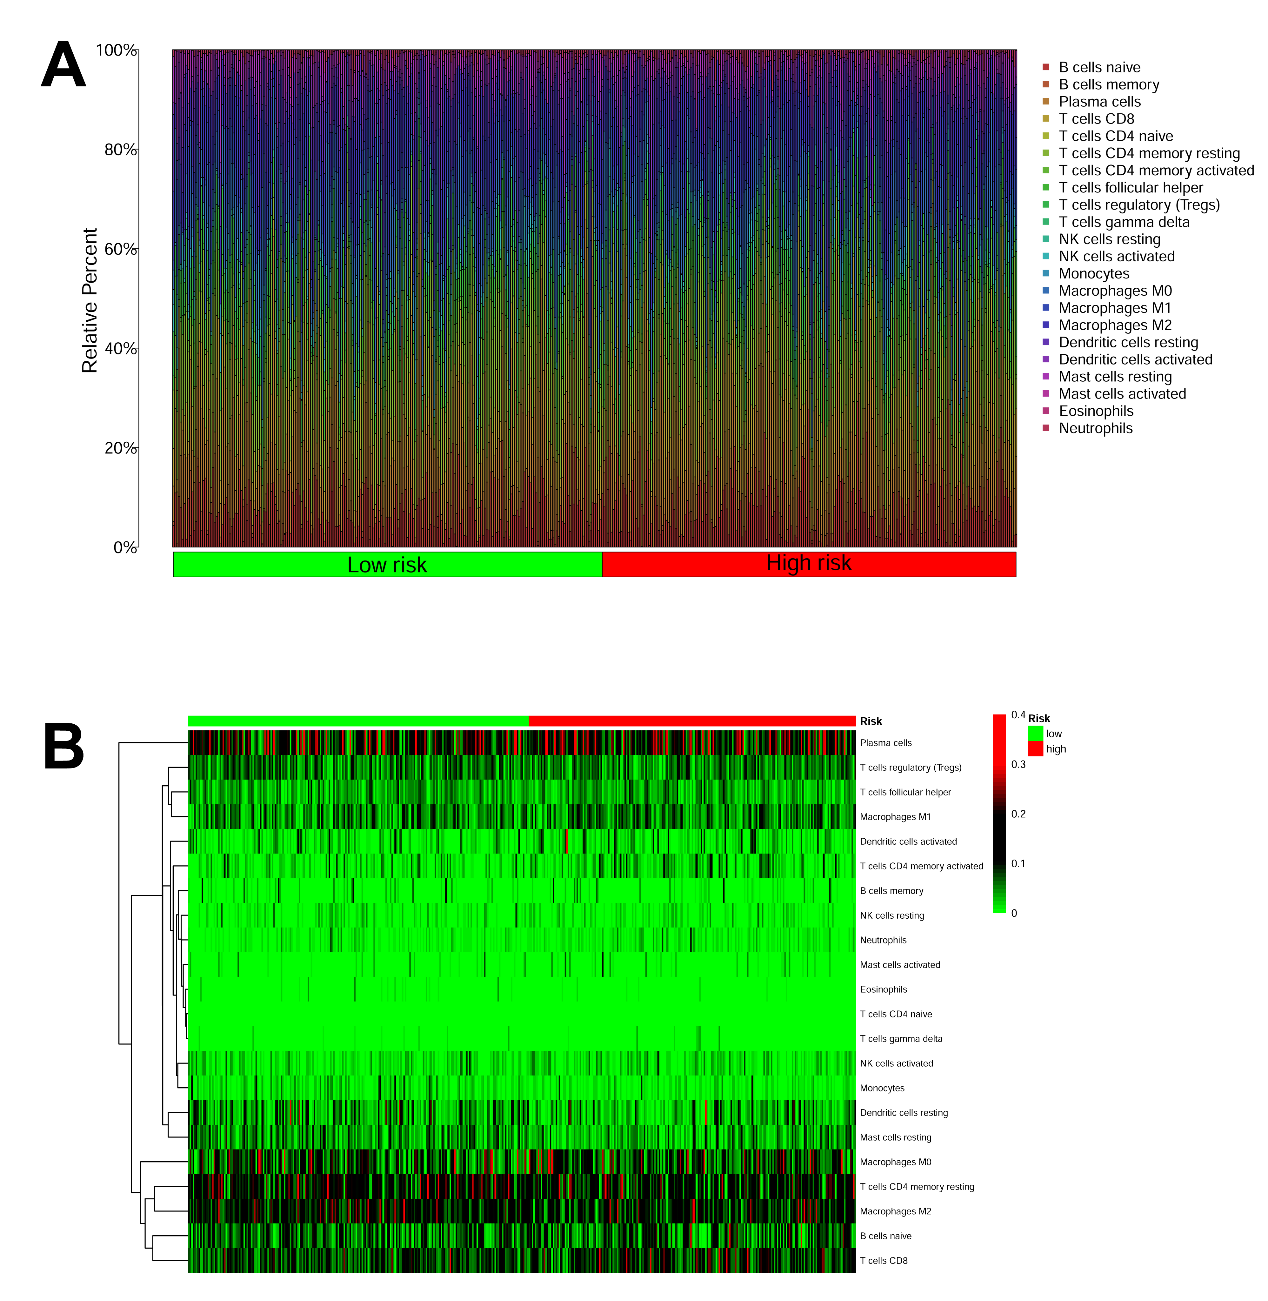


Figure S1. Estimation of immune cell fractions using the CIBERSORT algorithm. (A) Various immune cells are annotated with different colors as indicated in the legend, representing twenty-one different immune cell types. (B) Correlations between tumor-infiltrating immune cells are presented, with positive correlations shown in red and negative correlations shown in blue.


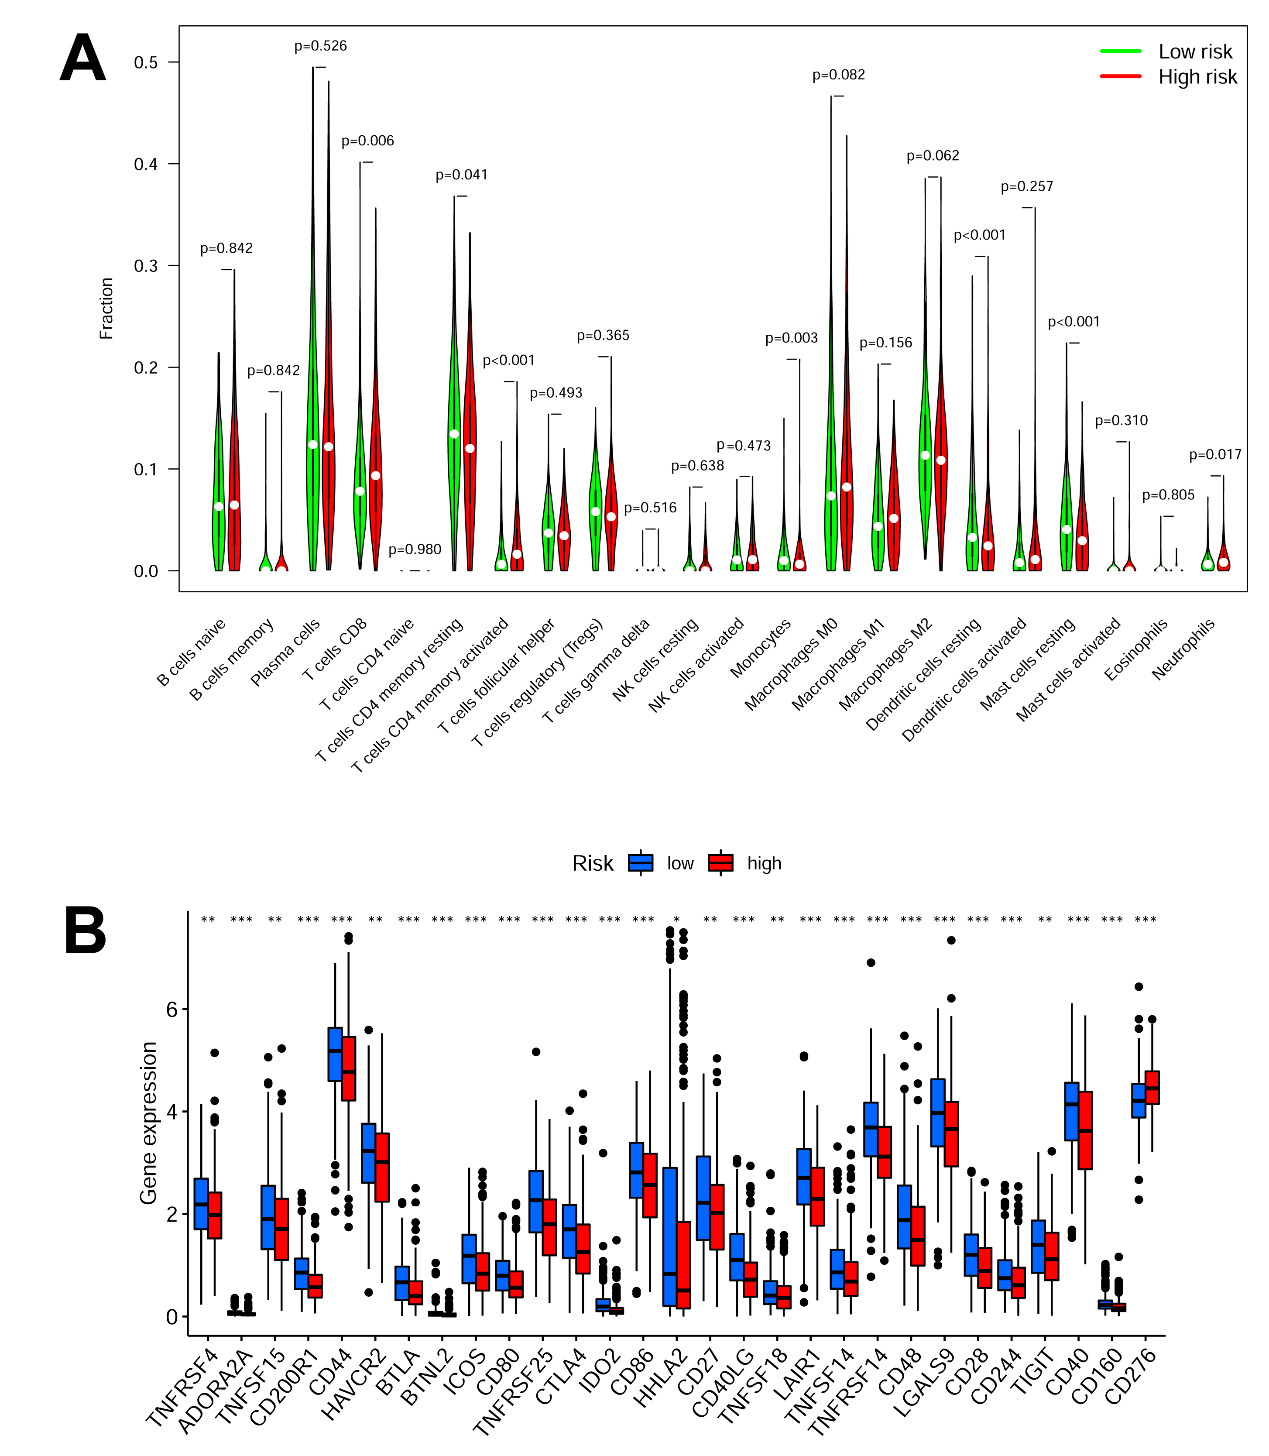


Figure S2. Comparison of the immune microenvironment and immune checkpoints in LUAD (Lung Adenocarcinoma) between the high-risk and low-risk groups. (A) A violin plot is presented to depict the abundance of immune-infiltrating lymphocytes in both the high-risk and low-risk groups. The red color represents high-risk samples, while the green color represents low-risk samples. (B) The expression levels of 28 immune checkpoints are compared between the high-risk group and the low-risk group. High-risk patients are denoted in red, while low-risk patients are denoted in blue.*P<0.05, **P<0.01 and ***P<0.001.


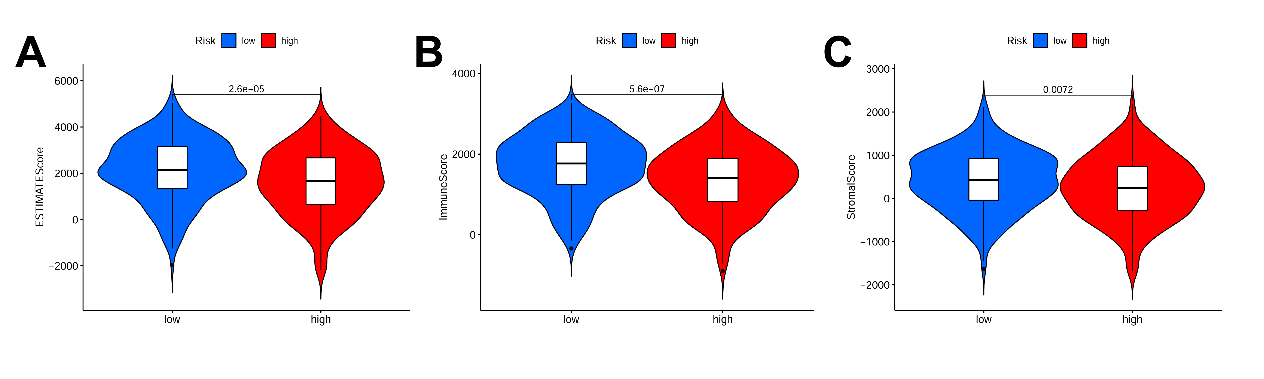


Figure S3. Comparison of the immune microenvironment and immune-stromal score in LUAD is shown between the high-risk and low-risk groups. (A) Violin plot illustrates the distribution of the ESTIMATE score between the low-risk and high-risk groups. (B) Violin plot represents the distribution of the immune score between the low-risk and high-risk groups. (C) Violin plot showcases the distribution of the stromal score between the low-risk and high-risk groups.


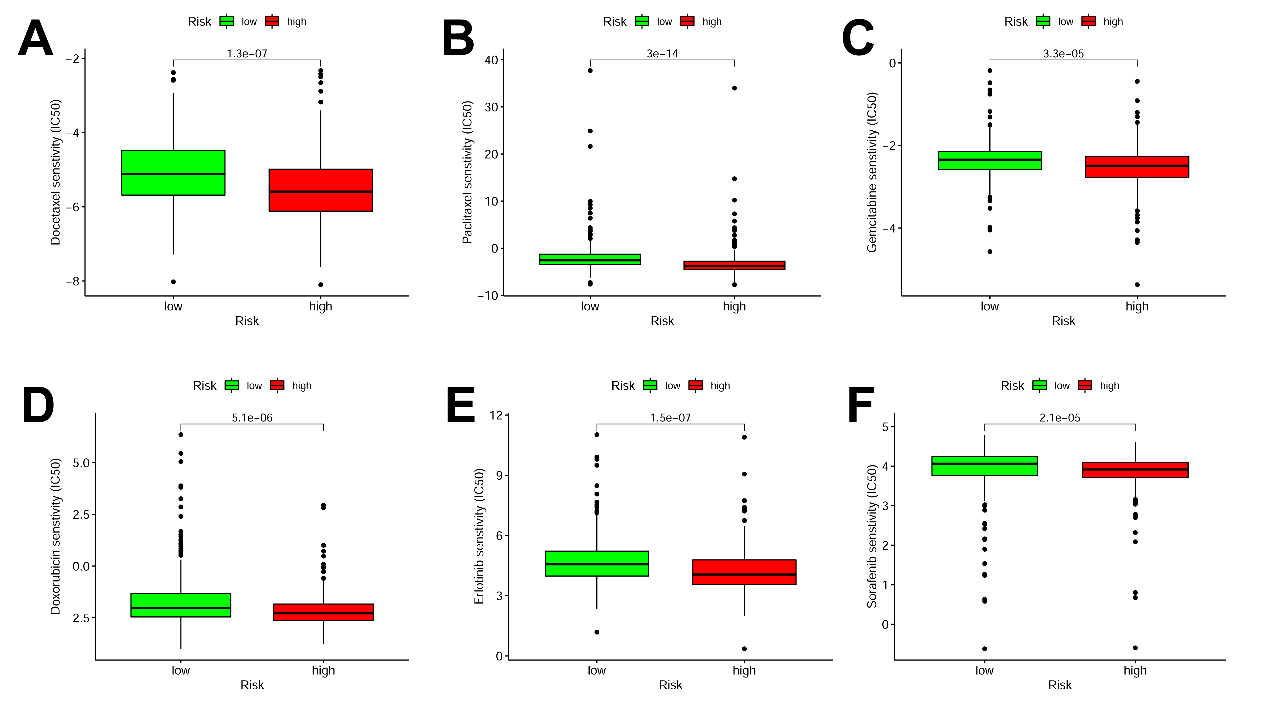


Figure S4. Comparison of responses to chemotherapy and targeted therapy between the high-risk and low-risk groups. The model serves as a potential predictor for chemosensitivity, as higher risk scores are associated with lower IC50 values for chemotherapeutics and targeted treatments. Specific drugs such as (A) docetaxel, (B) paclitaxel, (C) gemcitabine, (D) doxorubicin, (E) erlotinib, and (F) sorafenib are depicted to demonstrate these relationships.
